# Supplementary material for: Identification and characterization of two wheat Glycogen Synthase Kinase 3/ SHAGGY-like kinases
Source: PubMed Central journal article supplement (PMC3637598; doi:10.1186/1471-2229-13-64), 2013-04-18

Additional File 2: Neighbour-Joining Tree

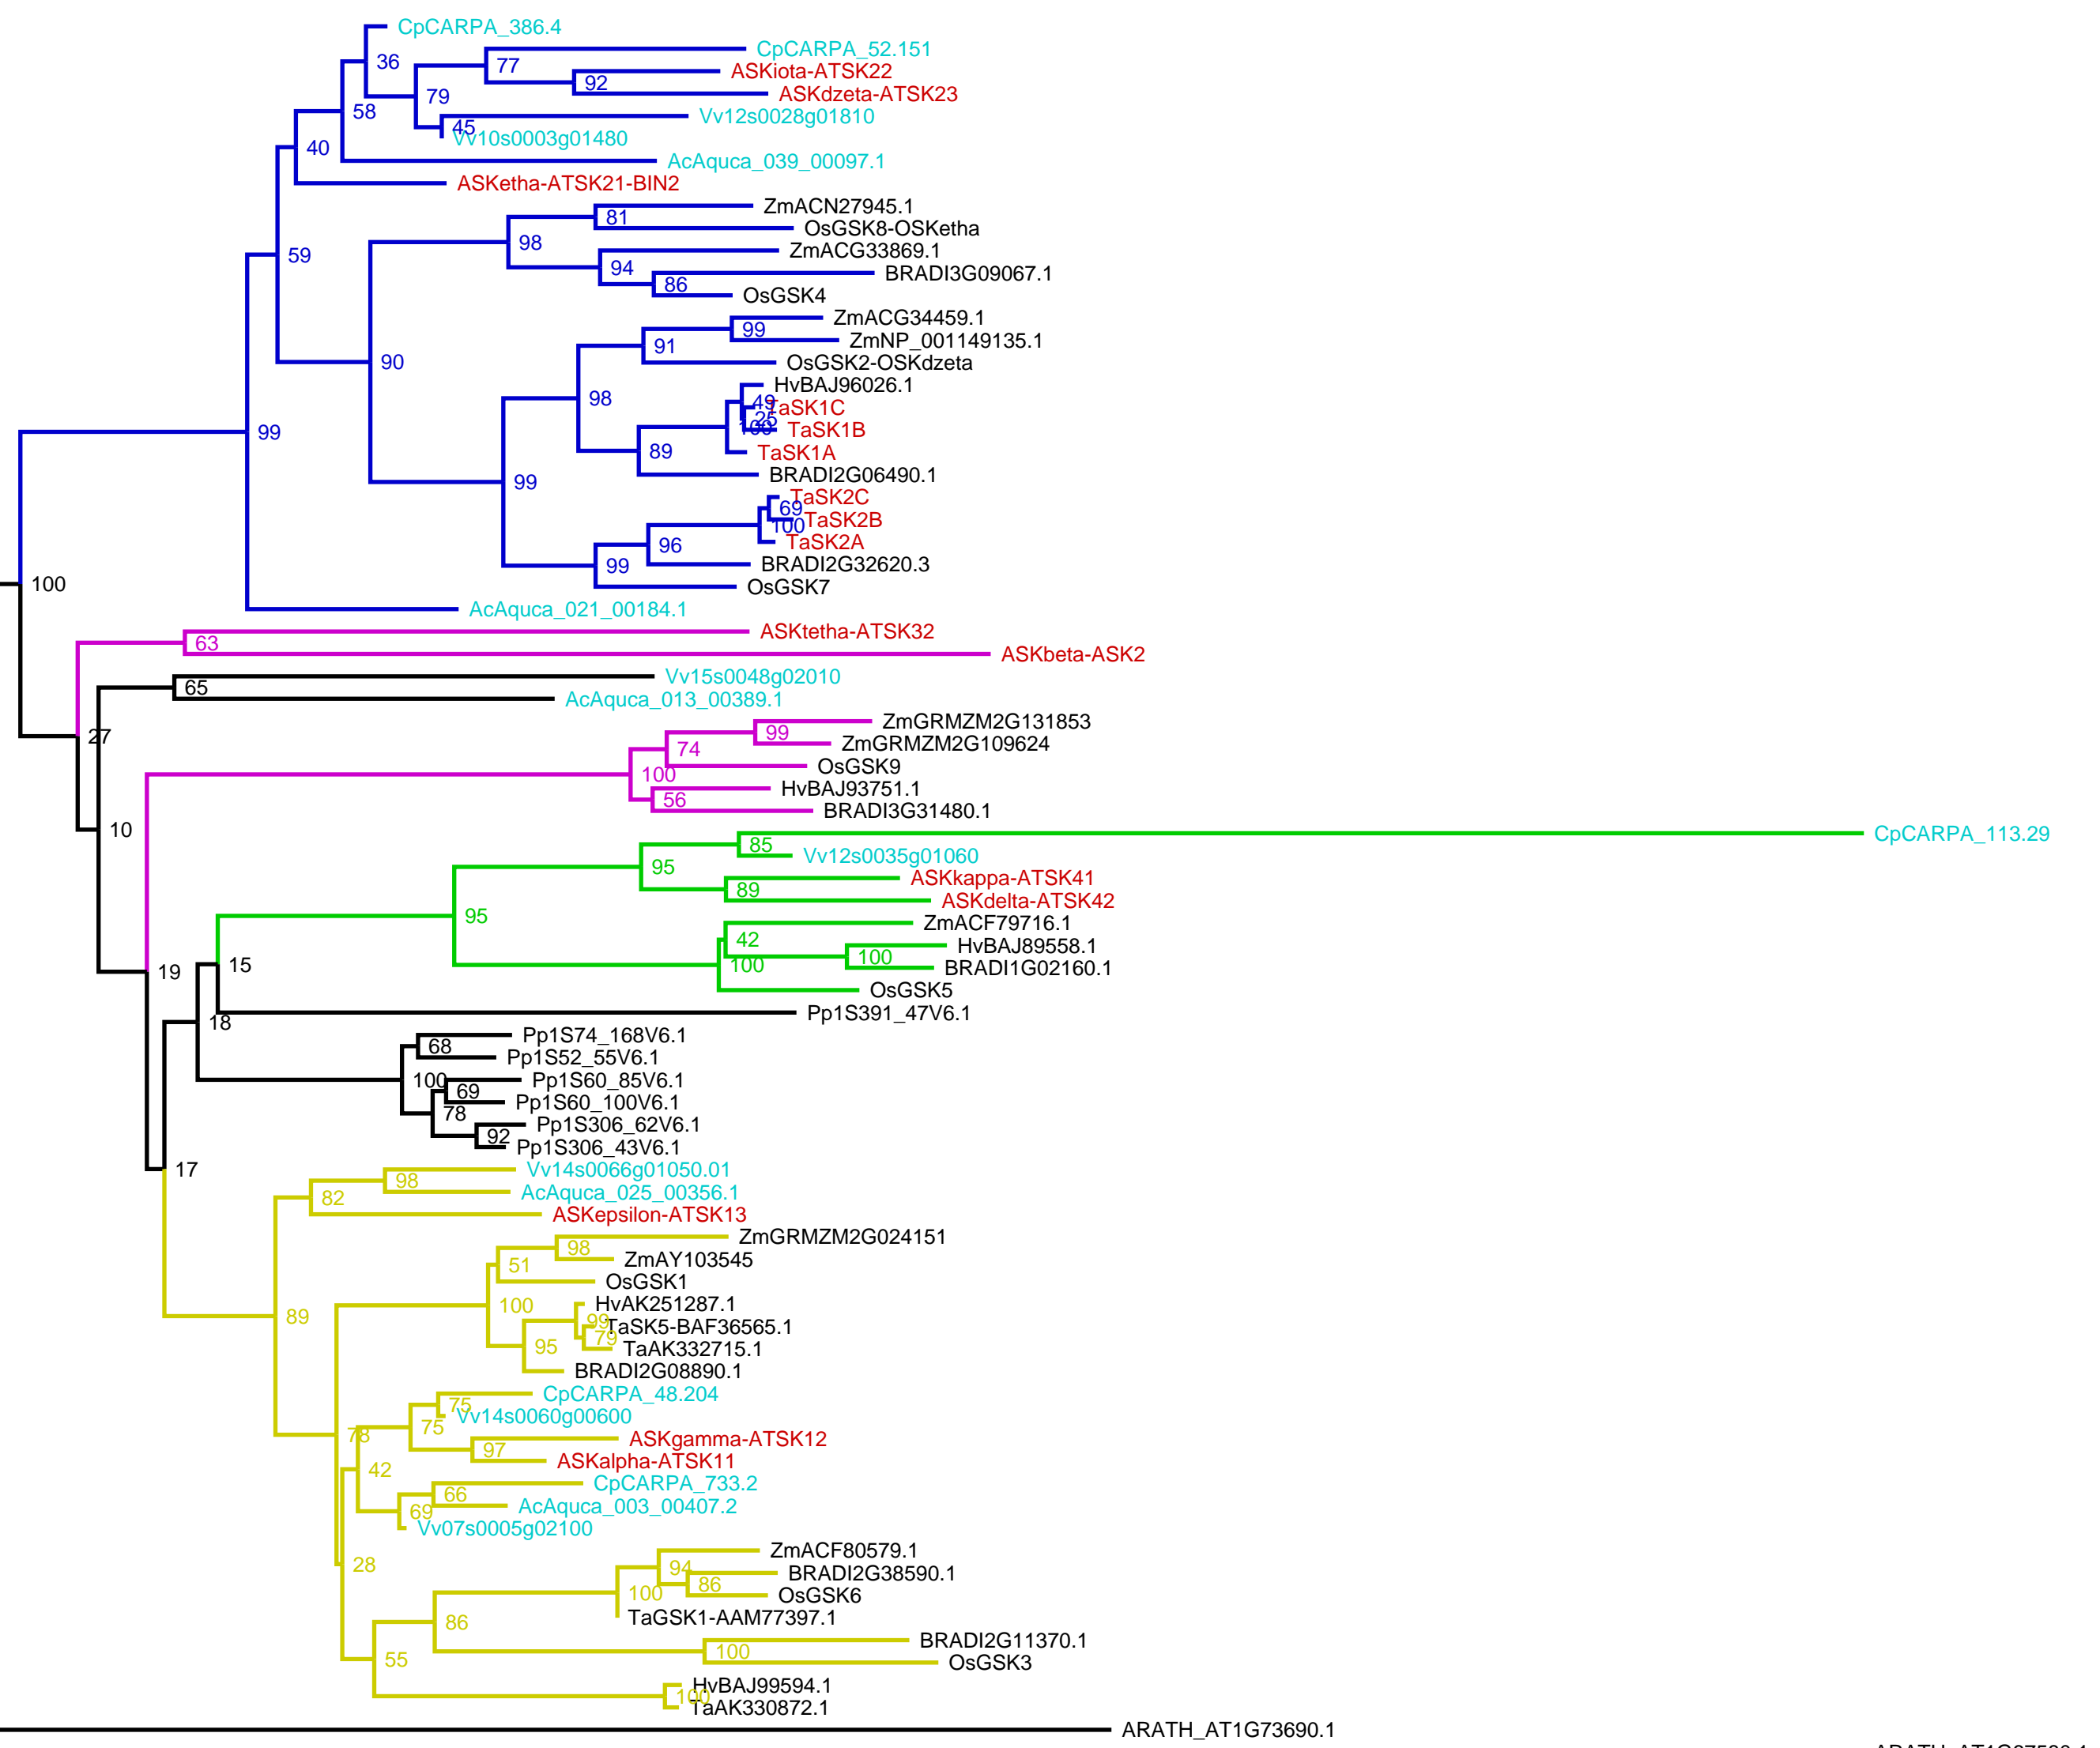

Supplement: 1471-2229-13-64-S2.pdf [file 1471-2229-13-64-S2.pdf]
